# Supplementary material for: Evaluation of Synthetic 2,4-Disubstituted-benzo[g]quinoxaline Derivatives as Potential Anticancer Agents
Source: MDPI journal article supplement (doi:10.3390/ph14090853), 2021-08-26
Supplement: s1 [file s1]

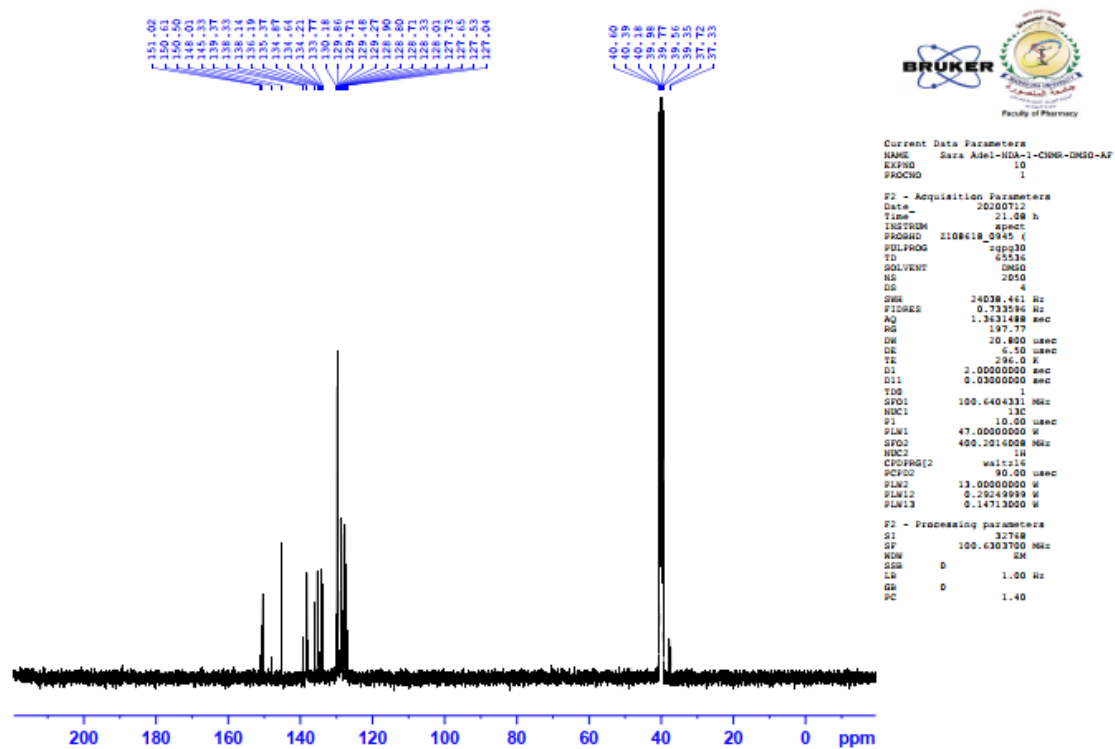

**Figure S2.**  $^{13}\text{C}$ -NMR Spectrum of compound 2

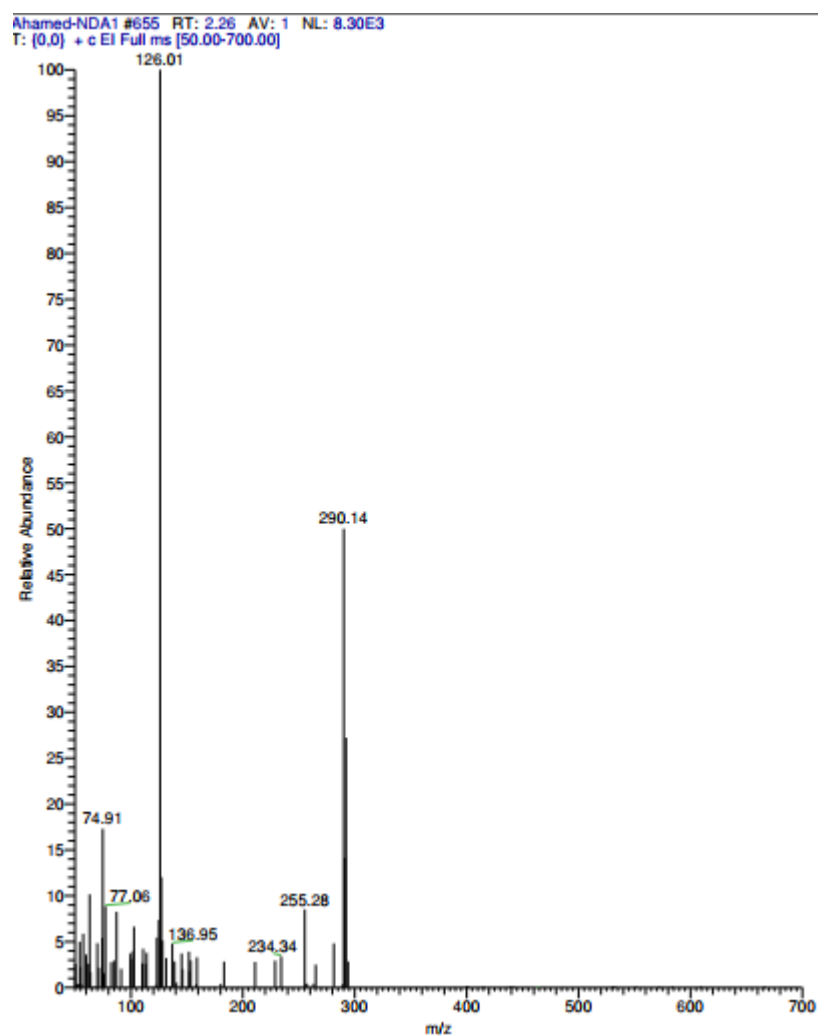

Figure S3. Mass Spectrum of compound 2

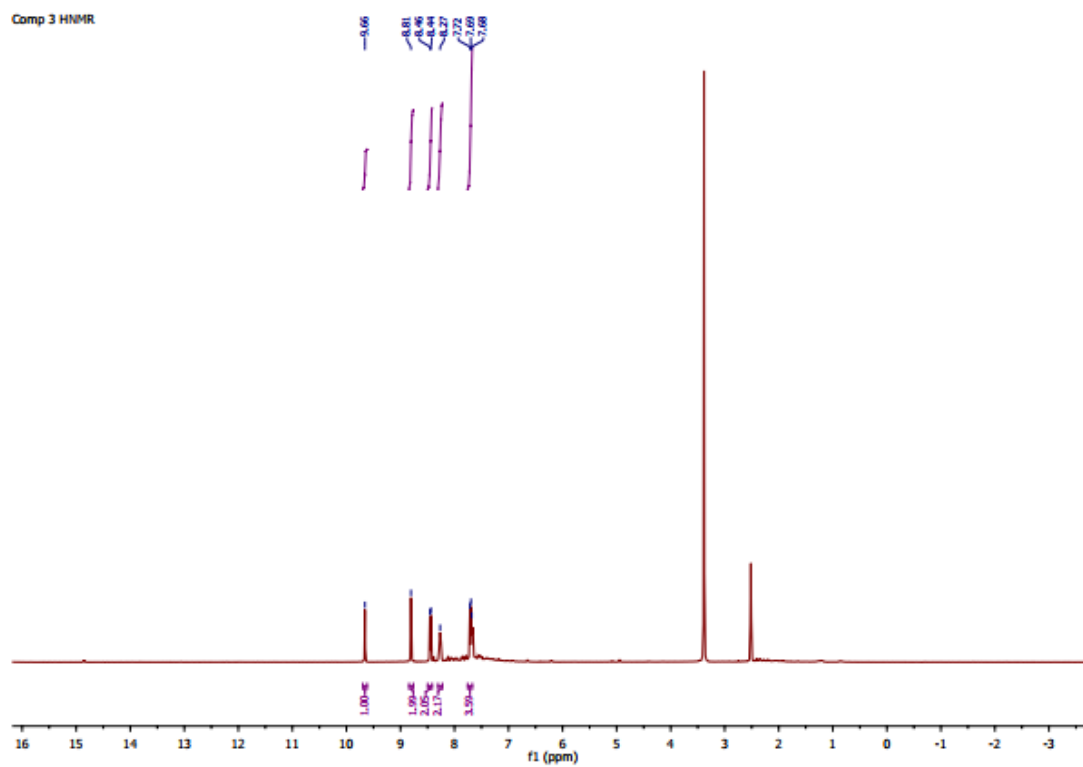

**Figure S4.**  $^1\text{H}$ -NMR Spectrum of compound **3**

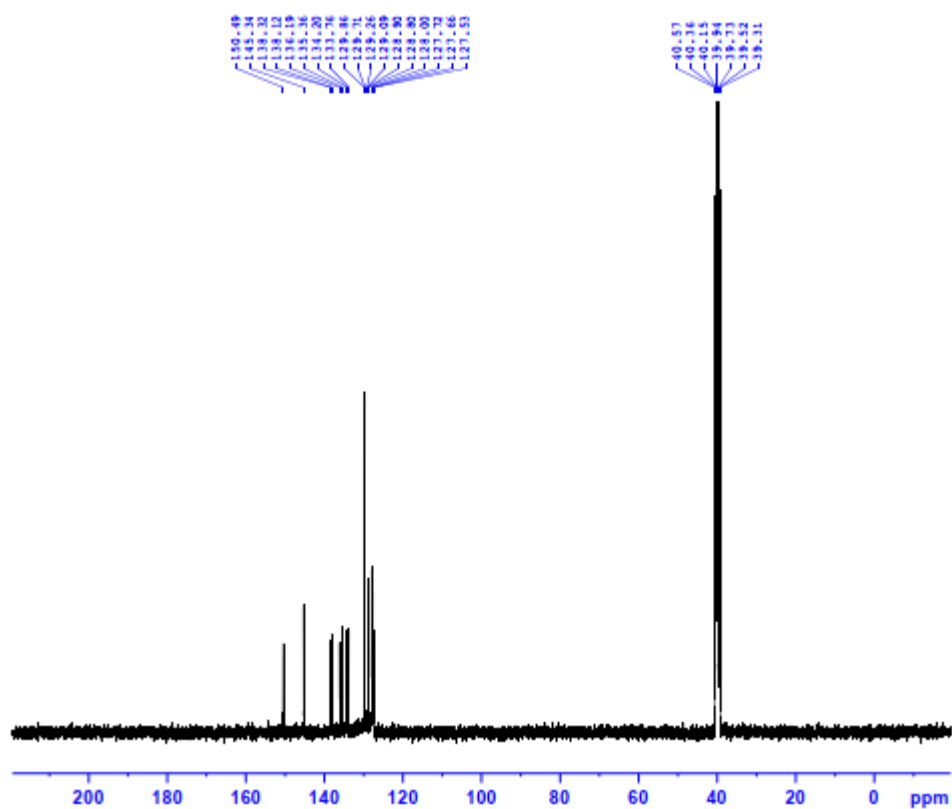

**Figure S5.**  $^{13}\text{C}$ -NMR Spectrum of compound 3

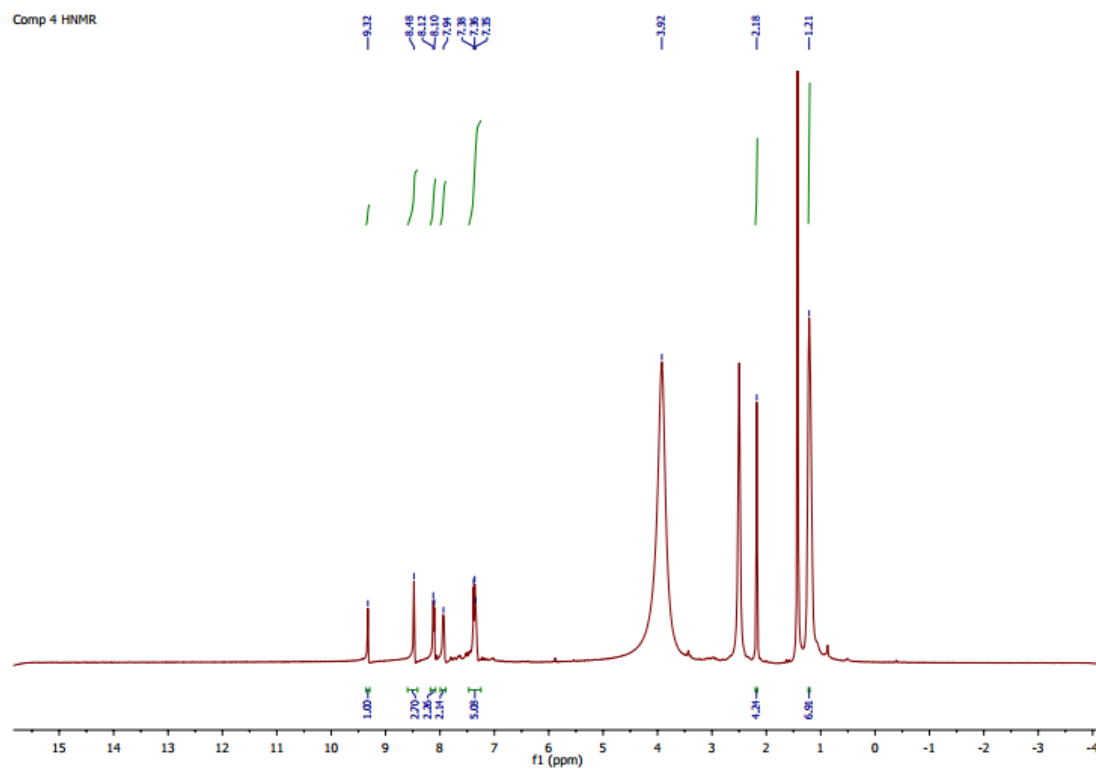

**Figure S6.**  $^1\text{H}$ -NMR Spectrum of compound **4**

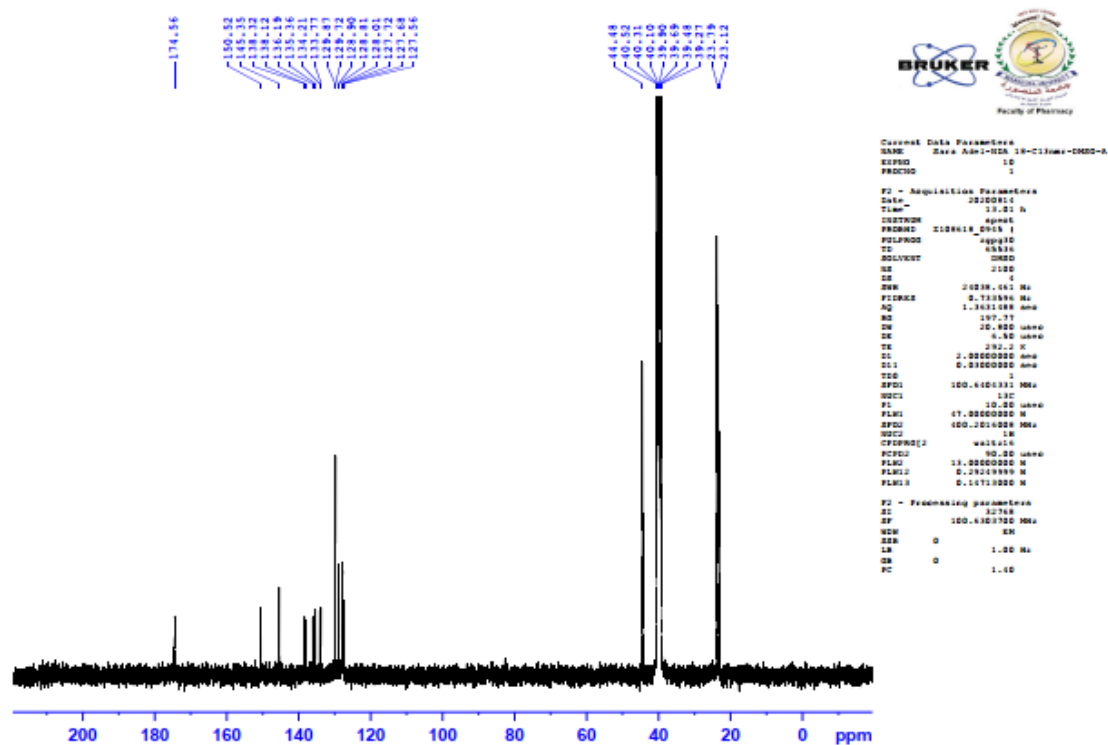

Figure S7.  $^{13}\text{C}$ -NMR Spectrum of compound 4

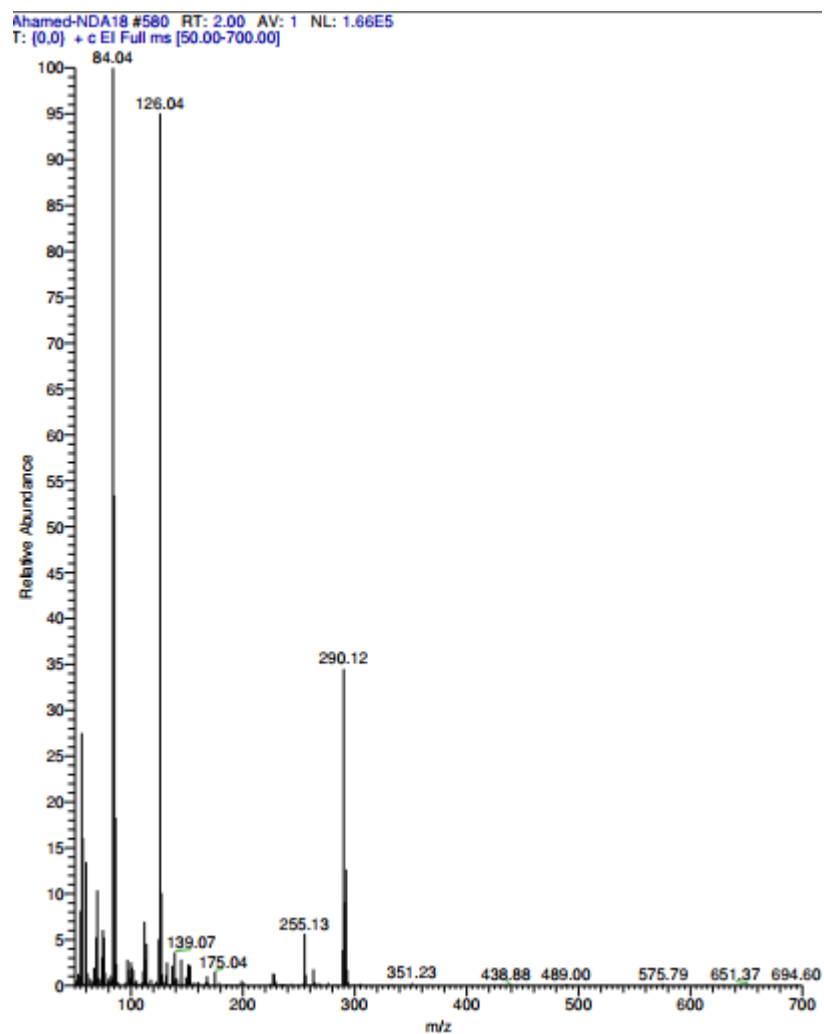

Figure S8. Mass Spectrum of compound 4



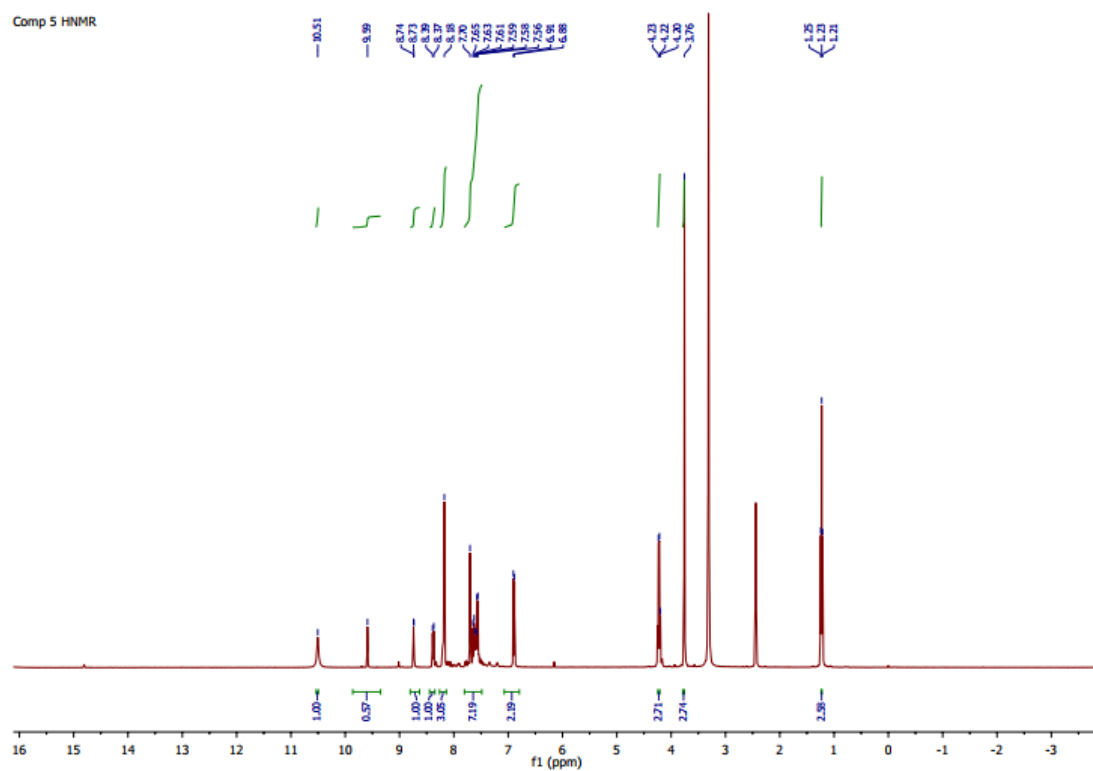

**Figure S9.**  $^1\text{H}$ -NMR Spectrum of compound **5**

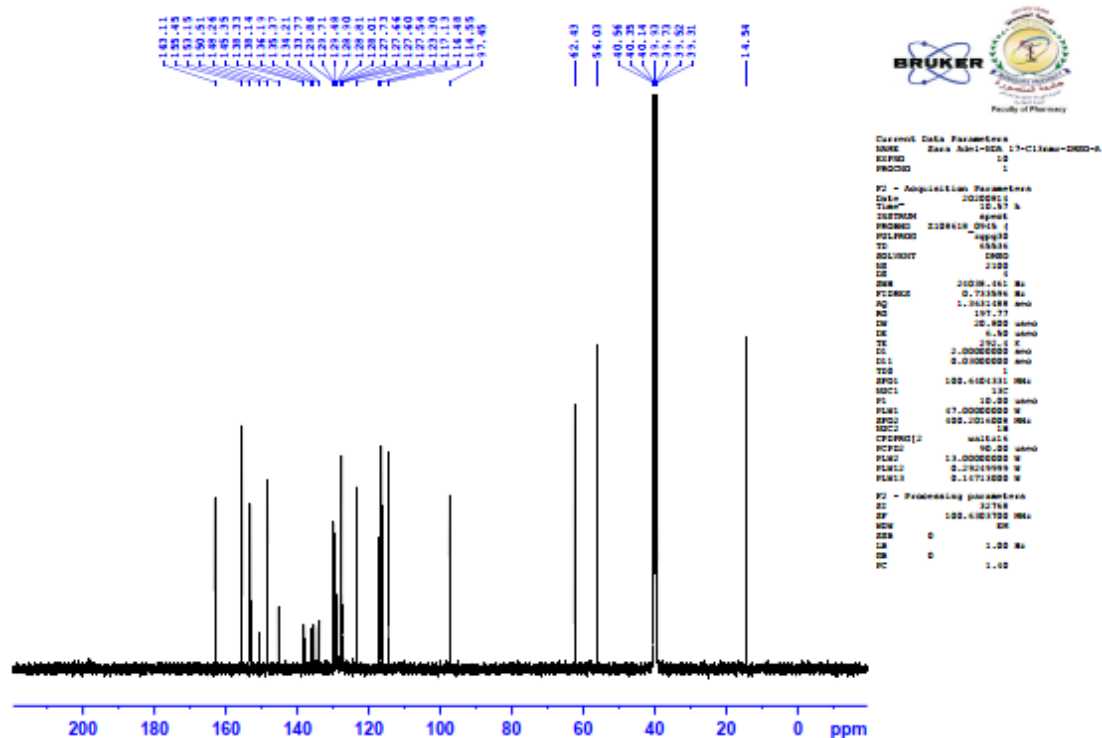

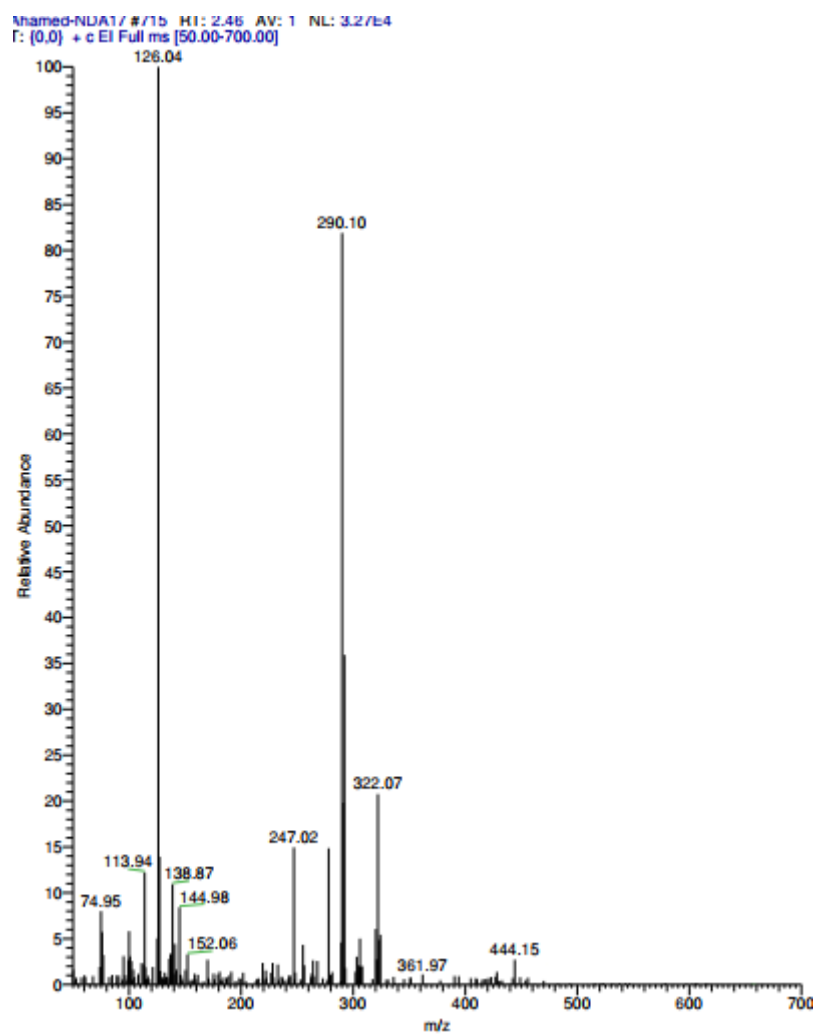

**Figure S11.** Mass Spectrum of compound 5

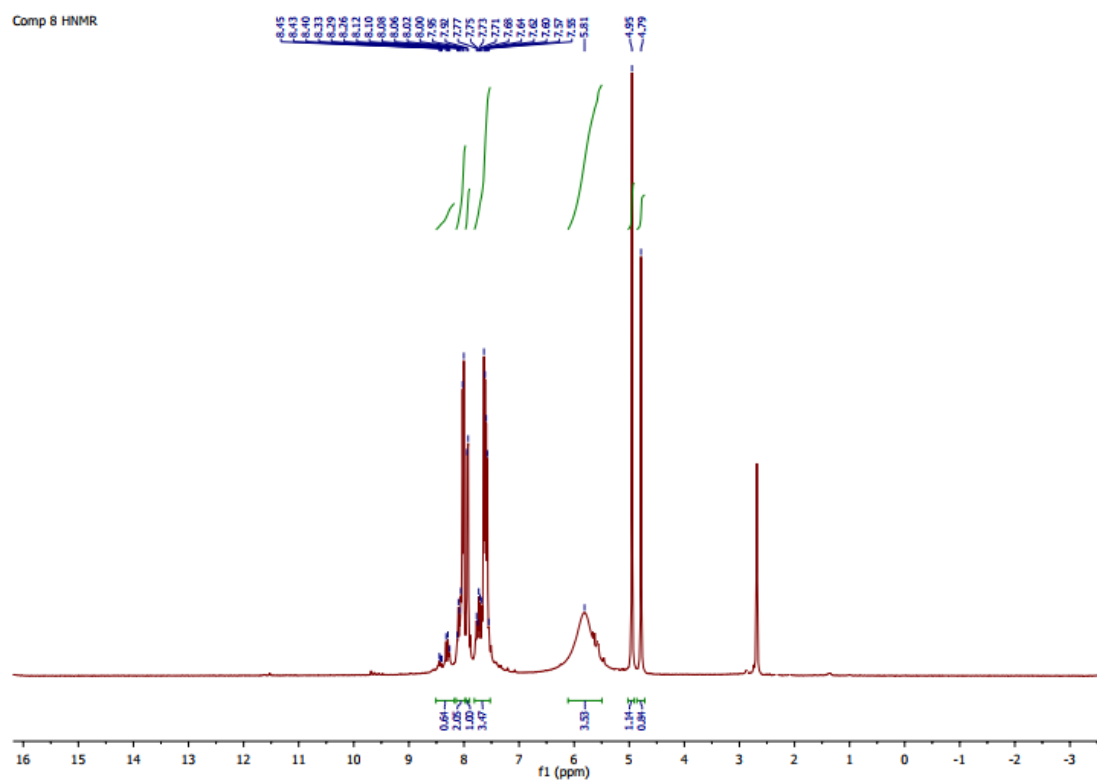

**Figure S12.**  $^1\text{H}$ -NMR Spectrum of compound 8

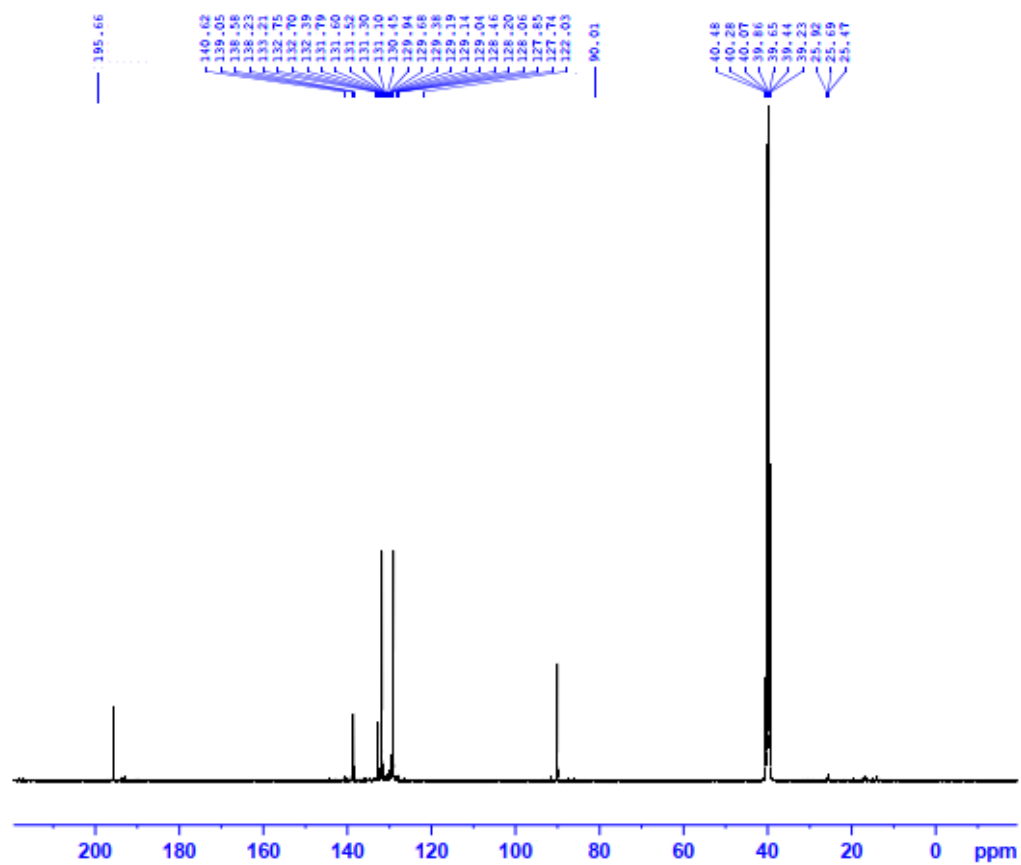

**Figure S13.**  $^{13}\text{C}$ -NMR Spectrum of compound 8

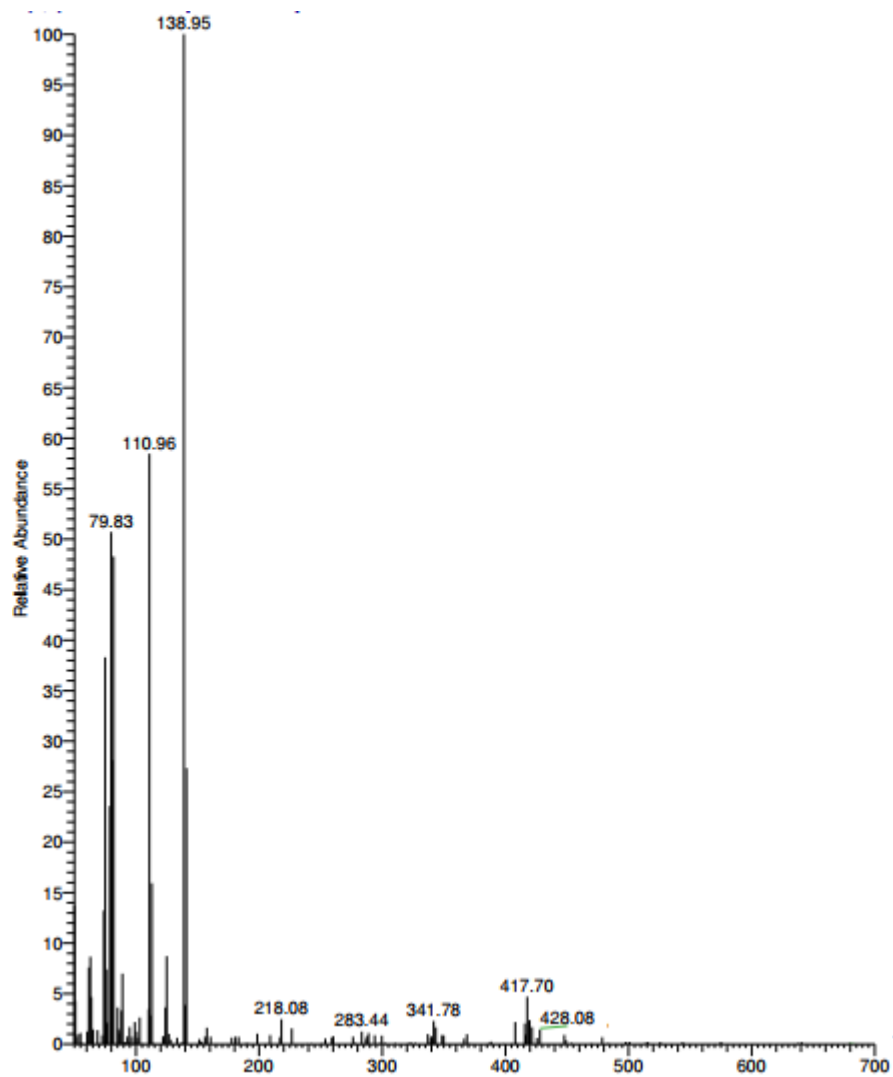

**Figure S14.** Mass Spectrum of compound 8

Comp 9 HNMR

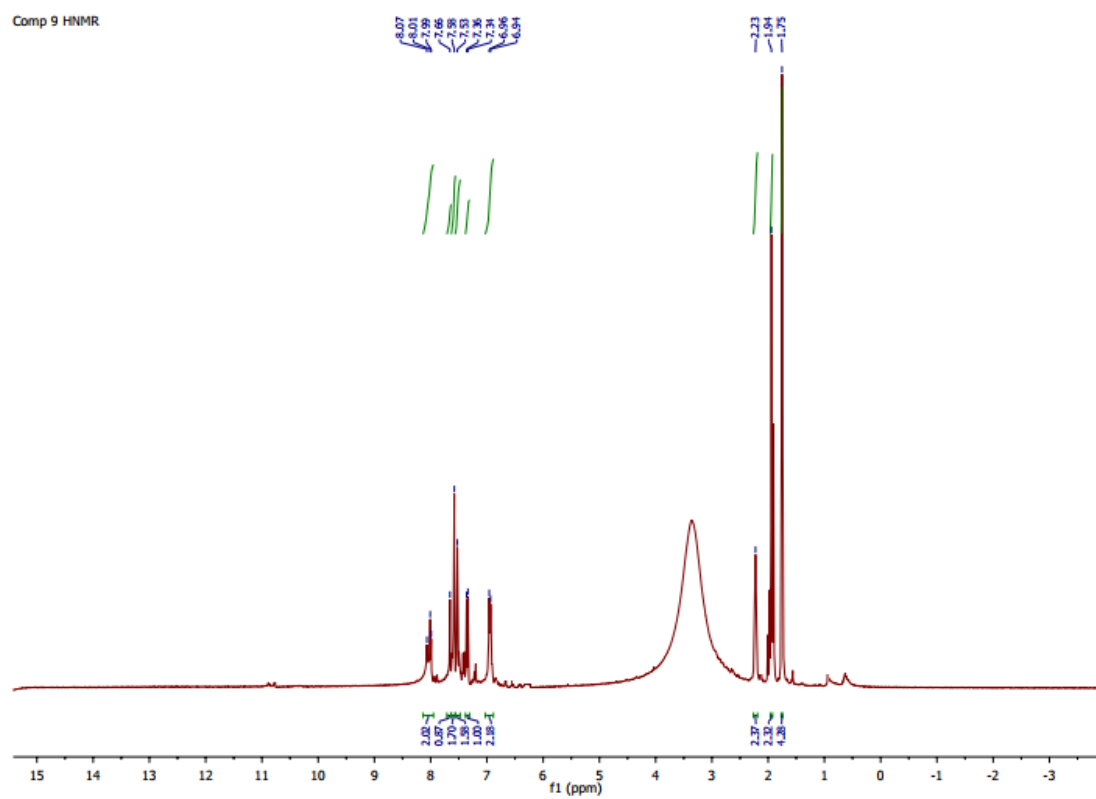

**Figure S15.**  $^1\text{H}$ -NMR Spectrum of compound 9

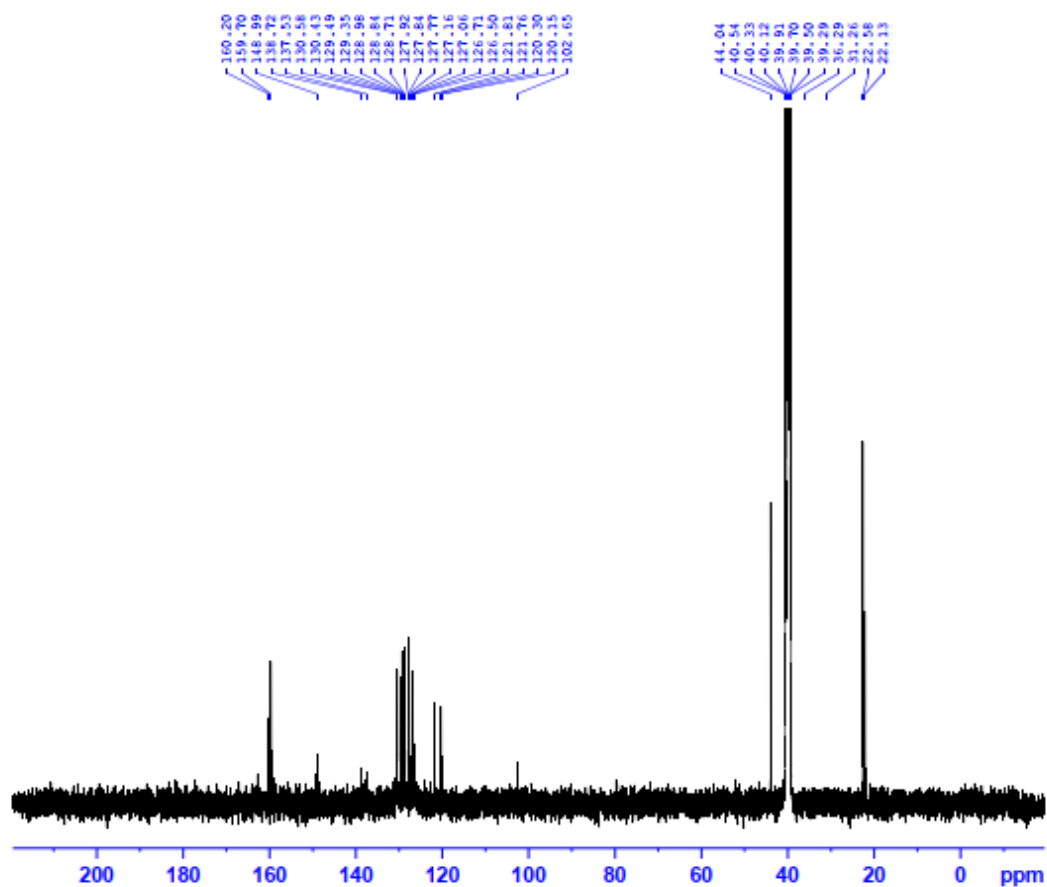

**Figure S16.** <sup>13</sup>C-NMR Spectrum of compound 9
